# Supplementary material for: White polymer light-emitting diodes with ultra-large color shifts for pulse-width-modulation applications
Source: Royal Society of Chemistry journal article supplement (doi:10.1039/c9tc03266e), 2019-01-01
Supplement: c9tc03266e1.pdf [file c9tc03266e1.pdf]

**Electronic Supplementary Information**

**White Polymer Light-Emitting Diodes with Ultra-Large Color Shift  
for Pulse-Width-Modulation Application**

Jiixin Zhang<sup>a</sup>, Feng Peng<sup>a,b</sup>, Zhiming Zhong<sup>\*,a,b</sup>, Lei Ying<sup>\*,a,b</sup>, Yong Cao<sup>a</sup>

<sup>a</sup> Institute of Polymer Optoelectronic Materials and Devices, State Key Laboratory of Luminescent Materials and Devices, South China University of Technology, Guangzhou 510640, China

<sup>b</sup> South China Institute of Collaborative Innovation, Dongguan, 523808, China

**Corresponding Authors**

\*E-mail: name.zzm@gmail.com (Z. Zhong)

\*E-mail: msleiyang@scut.edu.cn (L. Ying)

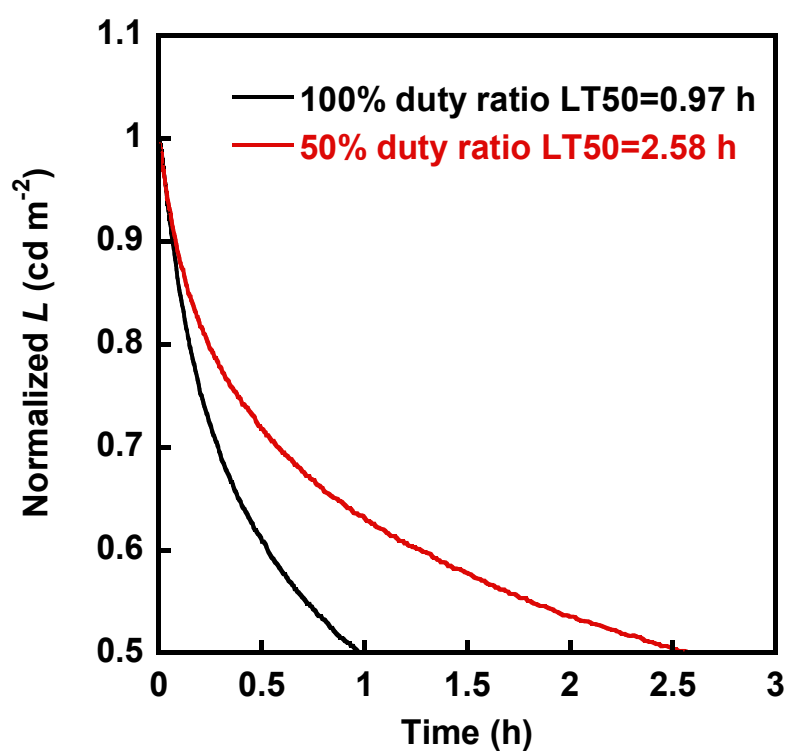

**Figure S1.** The lifetime of optimized WPLED at 6 V with 50% and 100% duty ratios. The initial luminance was corresponding to the Figure 4a. The actual operating time of former is  $2.58 \text{ h} \times 50\% = 1.29 \text{ h} > 0.97 \text{ h} \times 100\%$ .
